# Supplementary material for: Mechanistic insights into CO2 reduction on Cu/Mo-loaded two-dimensional g-C3N4(001)
Source: Royal Society of Chemistry journal article supplement (doi:10.1039/c6cp08409e), 2017-01-01
Supplement: c6cp08409e1.pdf [file c6cp08409e1.pdf]

## Supplementary Information

### **Mechanistic insights to CO<sub>2</sub> reduction on Cu/ Mo loaded two-dimensional g-C<sub>3</sub>N<sub>4</sub> (001)**

Penghui Li,<sup>b,&</sup> Fang Wang,<sup>b,&</sup> Shiqian Wei,<sup>b</sup> Xinyu Li<sup>b</sup> and Ying Zhou<sup>a,b\*</sup>

a) State Key Laboratory of Oil and Gas Reservoir Geology and Exploitation, Southwest Petroleum University, Chengdu 610500, China.

b) The Center of New Energy Materials and Technology, School of Materials Science and Engineering, Southwest Petroleum University, Chengdu 610500, China

&) These authors contributed equally to this work and should be considered co-first authors

\*To whom correspondence should be addressed

Email: yzhou44@swpu.edu.cn (Y. Zhou)

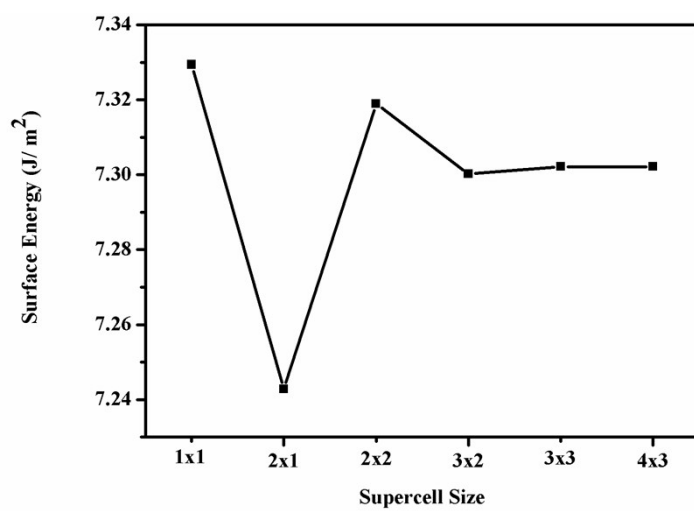

**Fig. S1** Convergence tests of surface energies for pure-C<sub>3</sub>N<sub>4</sub> (001) surface.

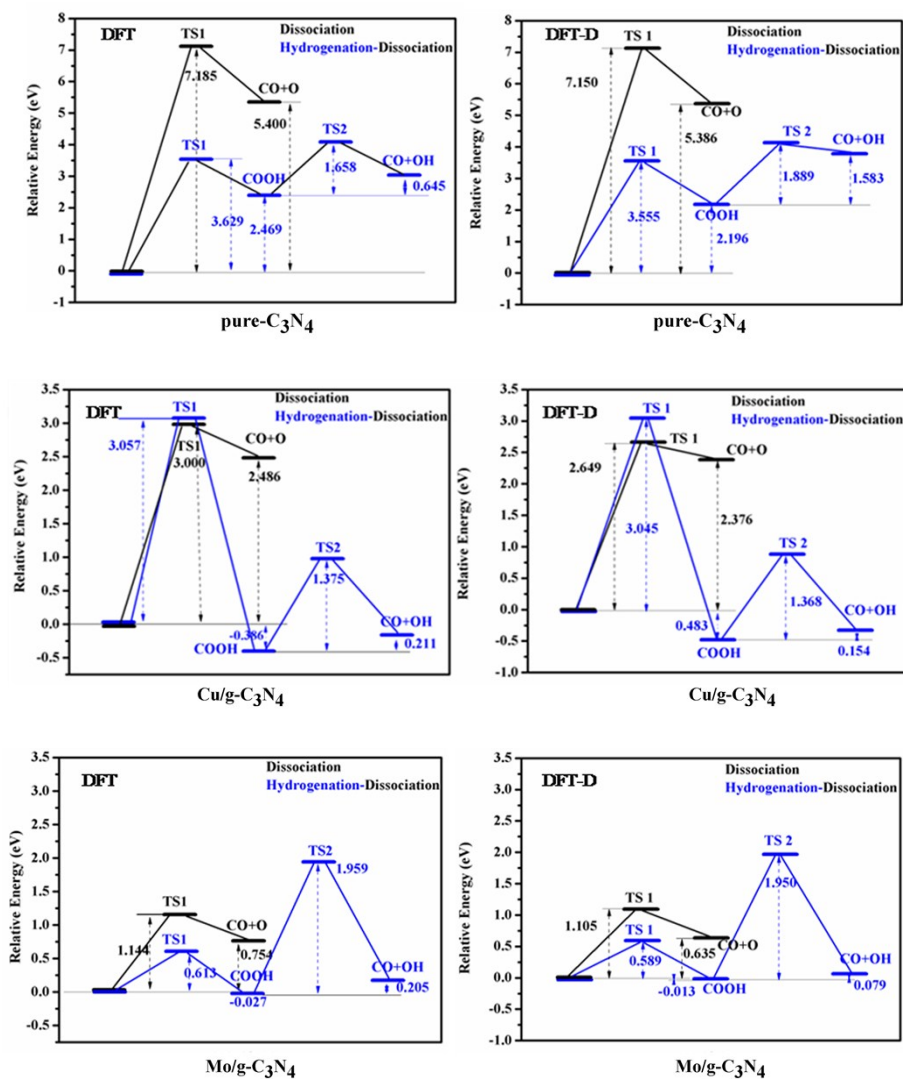

**Fig. S2** Comparisons of two mechanisms of CO<sub>2</sub> activation on g-C<sub>3</sub>N<sub>4</sub> (001), Cu/g-C<sub>3</sub>N<sub>4</sub> (001) and Mo/g-C<sub>3</sub>N<sub>4</sub> (001) with DFT and DFT-D method, respectively.
